# Supplementary material for: A nucleotide resolution map of Top2-linked DNA breaks in the yeast and human genome
Source: PubMed Central journal article supplement (PMC6813358; doi:10.1038/s41467-019-12802-5), 2019-10-24
Supplement: 41467_2019_12802_MOESM1_ESM.pdf [file 41467_2019_12802_MOESM1_ESM.pdf]

**Supplementary information for:**

**A nucleotide resolution map of Top2-linked  
DNA breaks in the yeast and human genome**

**Gittens et al. 2019**

Supplementary Figures 1-13  
Supplementary Tables 1-6

# Supplementary Figure 1

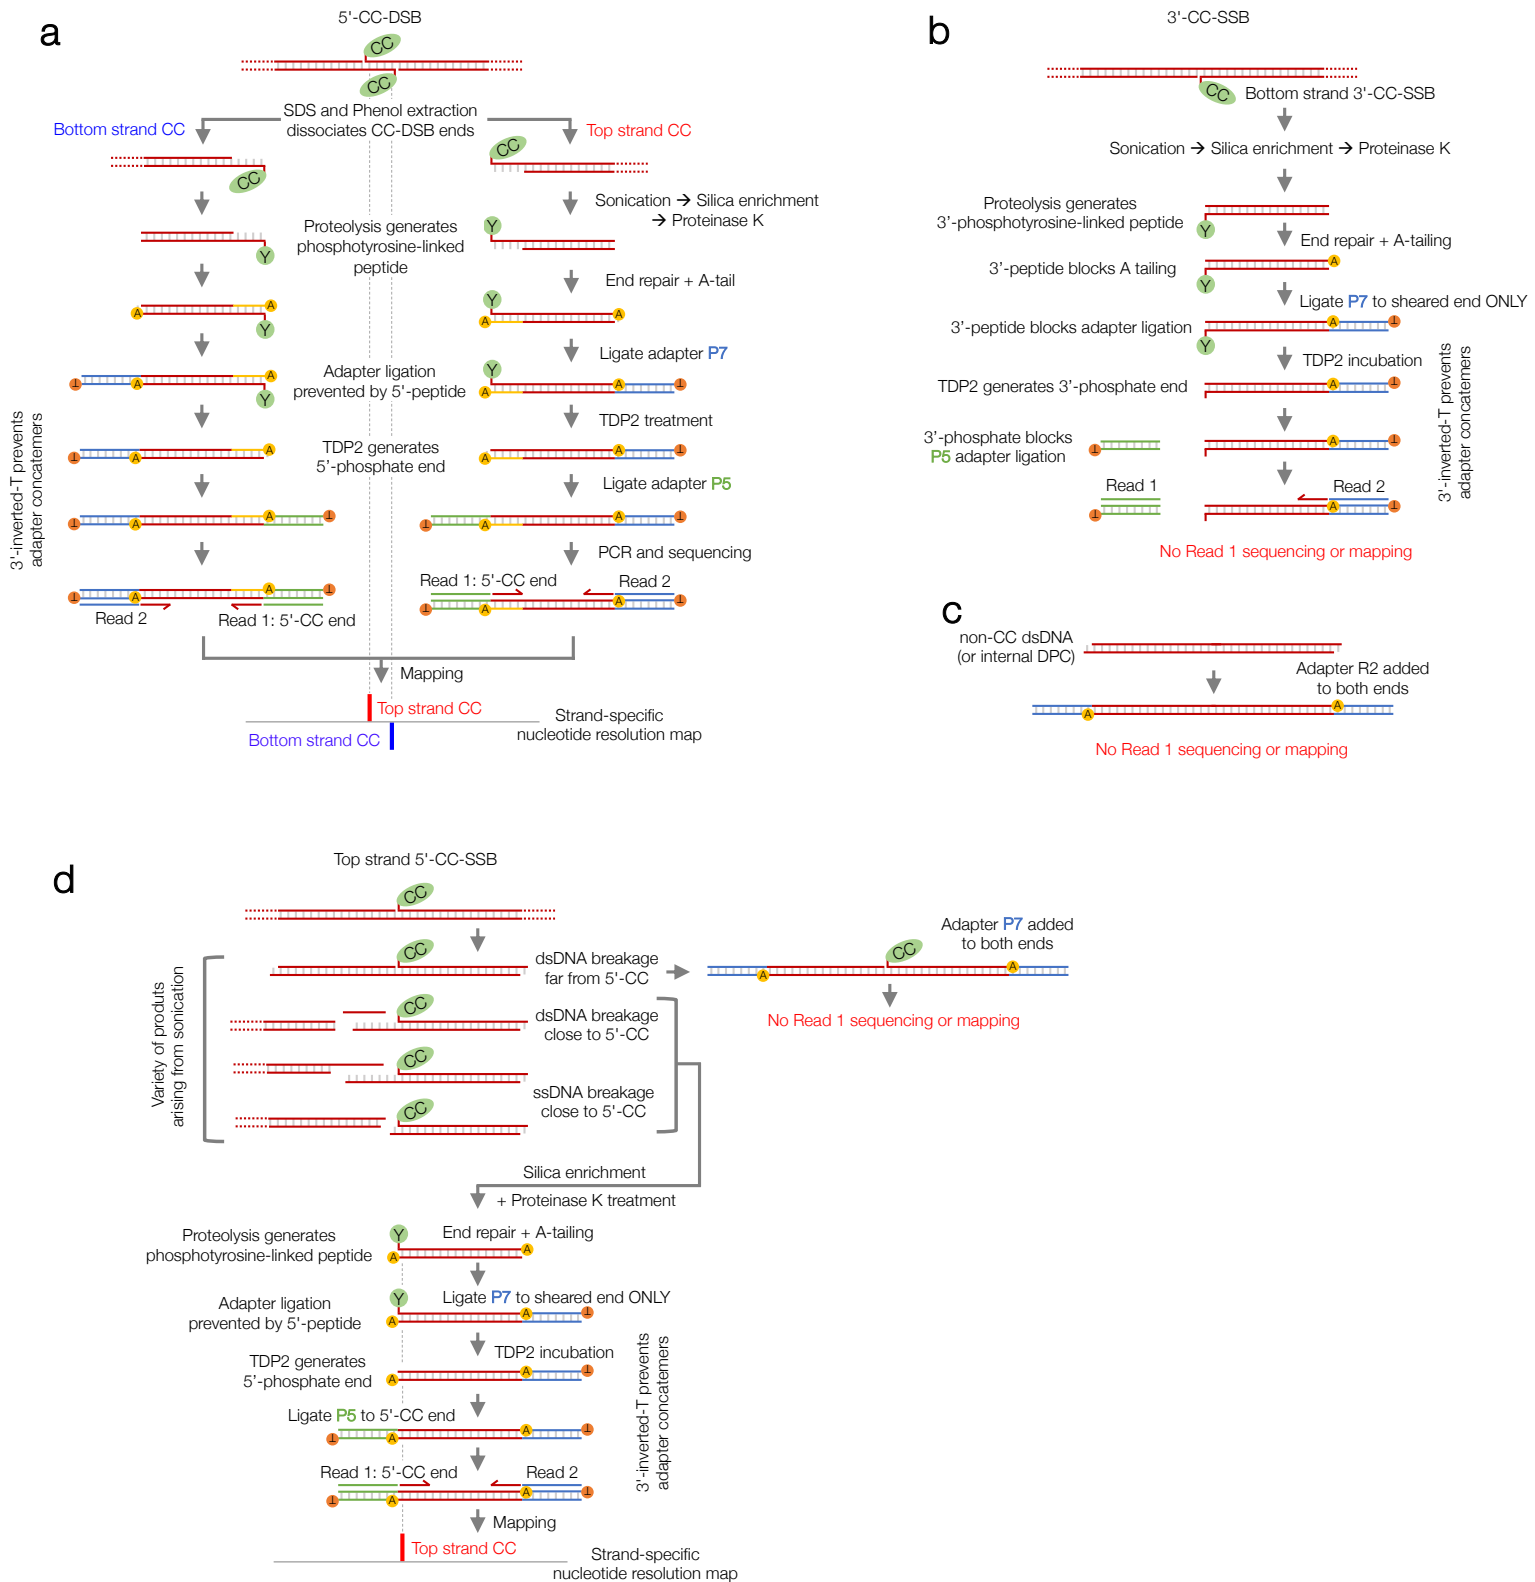

**Supplementary Figure 1. CC-seq library preparation steps selectively capture 5'-CC-DSBs and 5'-CC-SSBs, whilst excluding contaminant non-CC dsDNA, internal DNA-protein crosslinks (DPCs), and 3'-CC-SSBs.**

**a**, Diagram showing how a 5'-CC-DSB receives adapter P7 on the sonicated termini, and P5 on the CC termini, resulting in sequenceable molecules.

**b**, Diagram showing how a 3'-CC-SSB receives adapter P7 on the sonicated terminus, and no adapter on the CC terminus, resulting in a non-sequenceable molecule.

**c**, Diagram showing how non-CC dsDNA and/or molecules with an internal DNA-protein crosslink (DPC) each receive adapter P7 on both termini, resulting in non-sequenceable molecules.

**d**, Diagram showing how a 5'-CC-SSB receives adapter P7 on the sonicated terminus, and P5 on the CC terminus, which is converted to a DSB end via sonication, resulting in a sequenceable molecule.

## Supplementary Figure 2

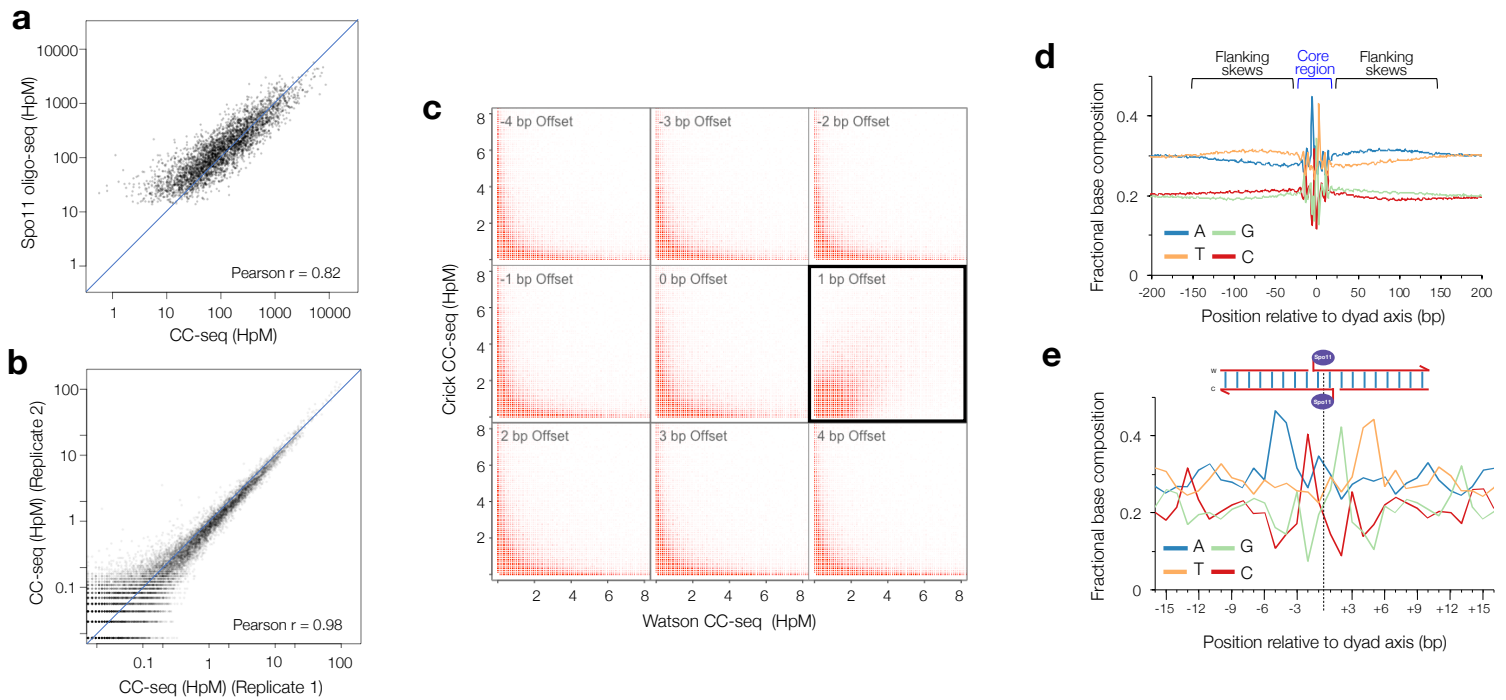

### Supplementary Figure 2. CC-seq maps covalent Spo11-linked DNA breaks in *S. cerevisiae* meiosis with nucleotide precision

**a**, Correlation of CC-seq and oligo-seq within annotated Spo11 hotspots<sup>28</sup>.

**b**, Correlation of 500 bp binned Spo11 maps from two representative replicates.

**c**, Correlation of Spo11 cleavages on Watson and Crick strand when offset by 1 bp (boxed), relative to other offsets from -4 to +4 bp.

**d-e**, Average nucleotide composition over a  $\pm 200$  bp (**d**) or 'core'  $\pm 15$  bp (**e**) window centred on the inferred dyad axis of Spo11 DSBs identified by CC-seq. Bases reported are for the top strand only. The core region is likely to be the bases directly influencing Spo11 binding and/or catalysis<sup>28</sup>. Weak, rotationally symmetrical  $\sim 150$  bp wide flanking skews are likely to be caused by chromatin structure adjacent to preferred Spo11-DSB sites.

## Supplementary Figure 3

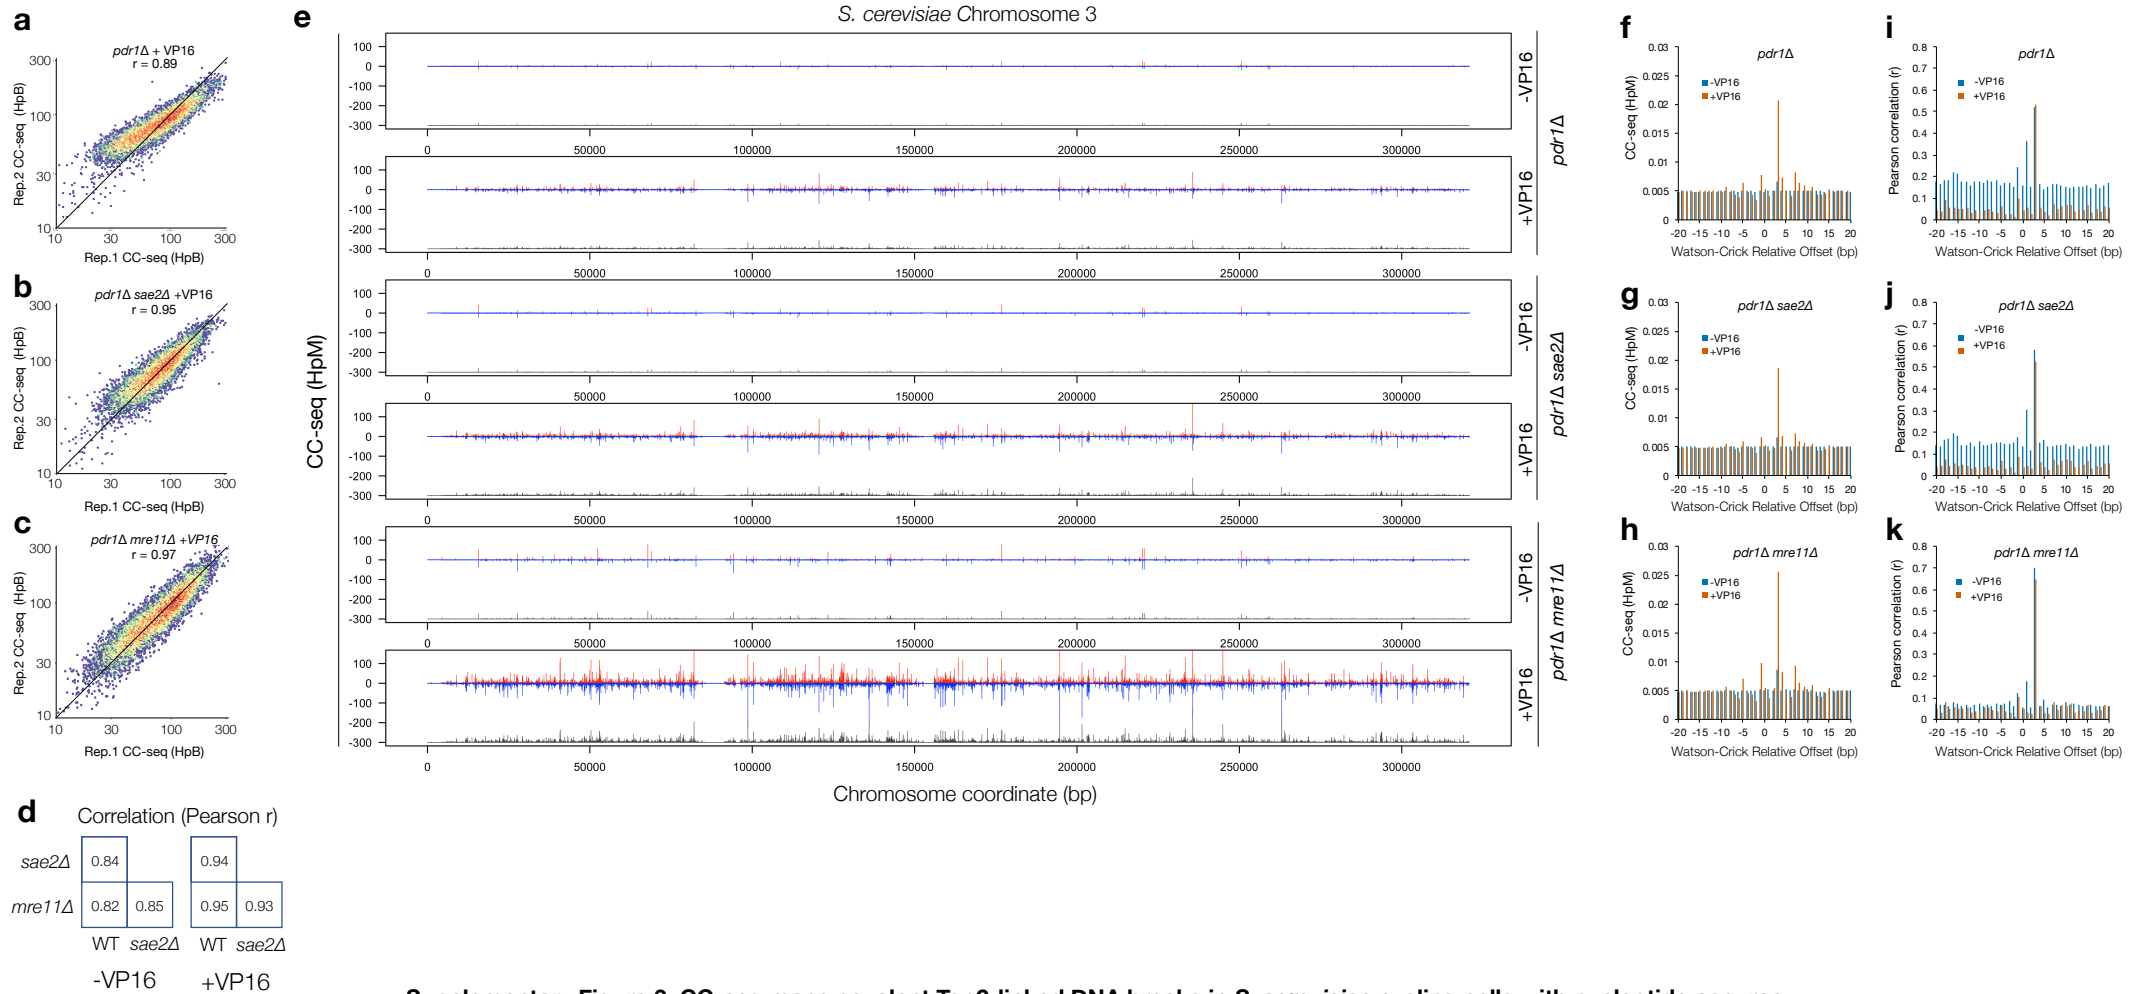

### Supplementary Figure 3. CC-seq maps covalent Top2-linked DNA breaks in *S. cerevisiae* cycling cells with nucleotide accuracy.

**a-c**, Correlation of 1 Kbp binned Top2 CC maps from *pdr1Δ* (A), *pdr1Δ sae2Δ* (B) and *pdr1Δ mre11Δ* (C) cells treated with VP16.

**d**, Pairwise Pearson correlation values for 100 bp binned Top2 CC maps from all assayed conditions. Each condition is a pool of two biological replicates.

**e**, Nucleotide-resolution vegetative *S. cerevisiae* Top2 CC map of chromosome 3 for all assayed conditions. Each condition is a pool of two biological replicates.

**f-h**, The normalised number of Top2 CCs retained in the *pdr1Δ* (f), *pdr1Δ sae2Δ* (g) and *pdr1Δ mre11Δ* (h) cells treated  $\pm$ VP16, after filtering to include only sites offset by the given number of base pairs. All data were normalised over a -100 to +100 bp window.

**i-k**, Pearson correlation ( $r$ ) of Top2 CC-seq signal on Watson and Crick strands, offset by the indicated distance in *pdr1Δ* (i), *pdr1Δ sae2Δ* (j) and *pdr1Δ mre11Δ* (k) cells treated  $\pm$ VP16.

## Supplementary Figure 4

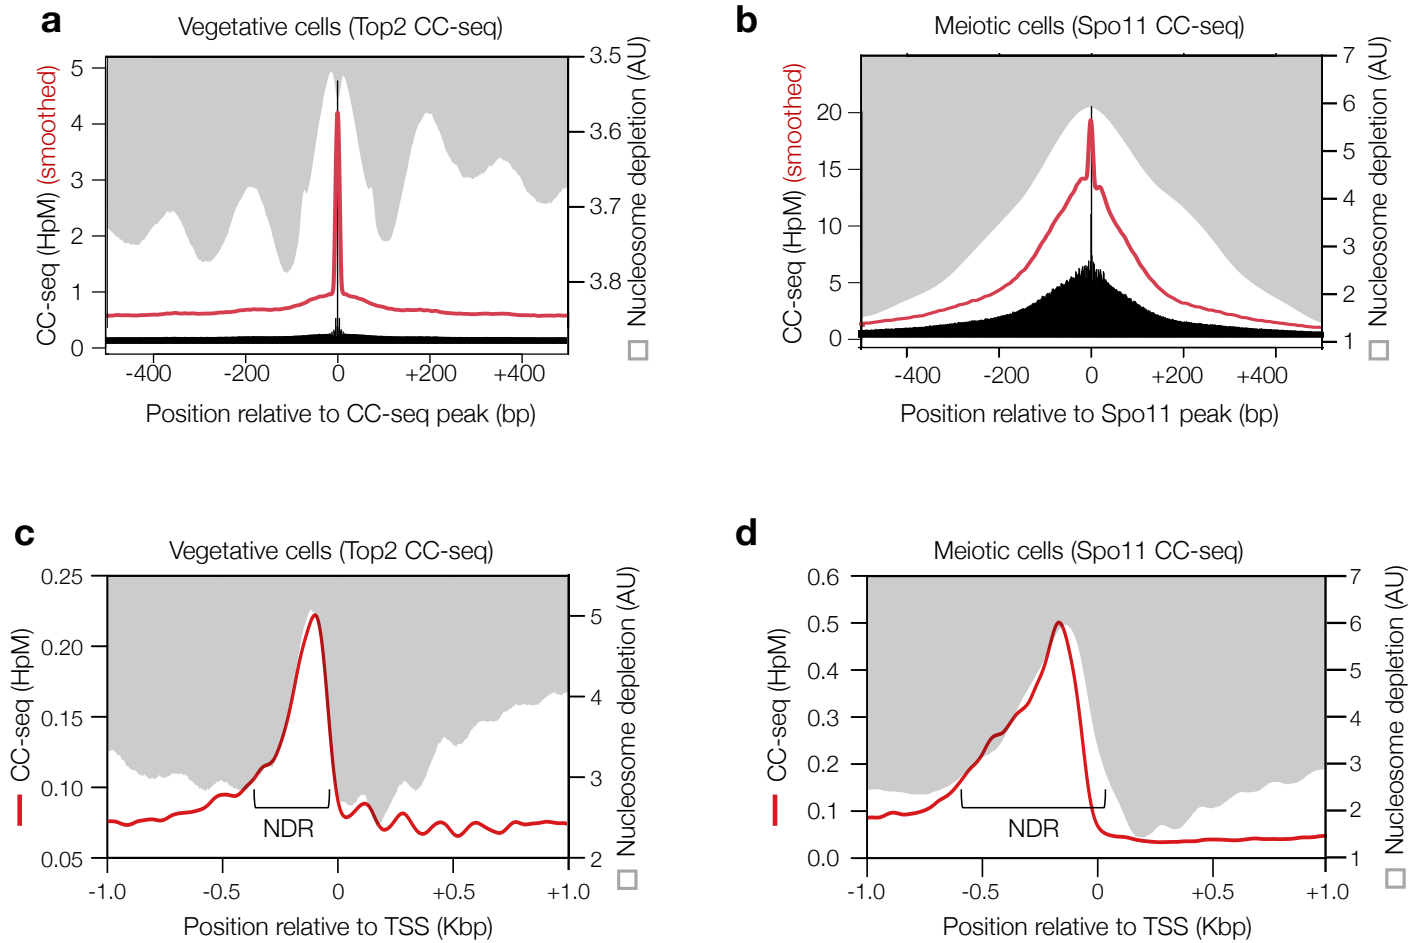

### Supplementary Figure 4. Top2 CC and Spo11 CC anticorrelate with nucleosome occupancy both globally and at TSSs.

**a-b**, Top2 CCs (**a**), and Spo11 CCs (**b**), mapped by CC-seq (raw=black, or smoothed=red) both anticorrelate with nucleosome occupancy measured by MNase-seq<sup>37</sup> (grey).

**c-d**, Top2 CC (**c**), and Spo11 CC (**d**) signals mapped by CC-seq (red) and nucleosome occupancy (grey) were aggregated centred on transcription start sites (TSSs) and smoothed with a 50 bp hann window. MNase-seq data<sup>37</sup> in (**a-d**) is inverted to emphasise spatial relationship between CC-seq and nucleosome depletion (white). Averaged meiotic (**d**) nucleosome depleted regions (NDRs) are wider than in vegetative cells (**c**), a relationship that correlates with averaged CC-seq profiles. HpM = Hits per million mapped reads per base pair.

## Supplementary Figure 5

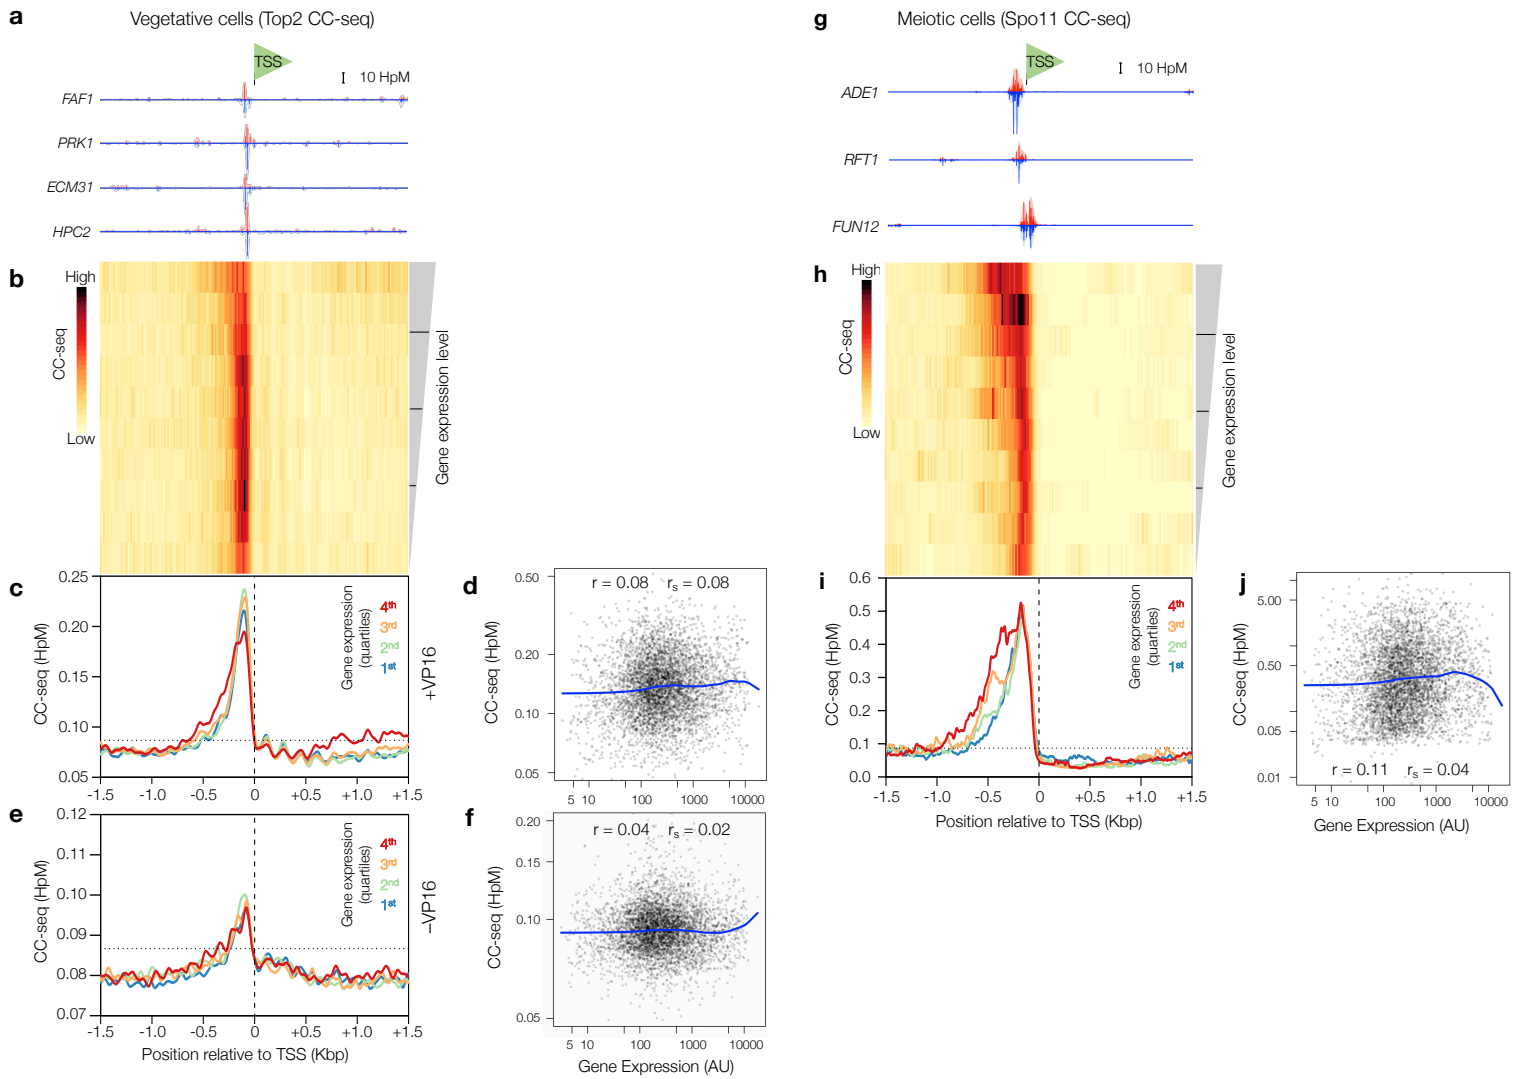

### Supplementary Figure 5. Top2 CC and Spo11 CC in *S. cerevisiae* are not quantitatively correlated with gene expression

**a-c**, Aggregation of Top2 CCs in a 3 Kbp window centred on orientated TSSs in VP16-treated vegetative *pdr1Δ S. cerevisiae* cells. Four example TSS loci are shown orientated in the 5'-3' direction (**a**). A heatmap of all TSS loci in the *S. cerevisiae* genome, with 10 aggregated rows stratified by the strength of downstream gene expression<sup>40</sup>. The colour scale indicates average Top2 CC density in each 15 bp bin (**b**). Loci were also stratified into quartiles of gene expression, and the average Top2 CC distribution in each quartile plotted. Horizontal line is the genome mean. Vertical line is the TSS (**c**).

**d**, Quantitative correlation between vegetative Top2 CC-seq (500 bp window directly upstream of TSS) and expression of downstream gene. Blue line = lowess curve. Pearson  $r$  and Spearman  $r_s$  values were calculated between CC-seq and log-transformed Expression.

**e-f**, As for (**c-d**), but vegetative Top2 CC-seq samples not treated with VP16.

**g-j**, As for (**a-d**), but meiotic Spo11 CC-seq analysis correlated against meiotic gene expression<sup>40</sup>.

## Supplementary Figure 6

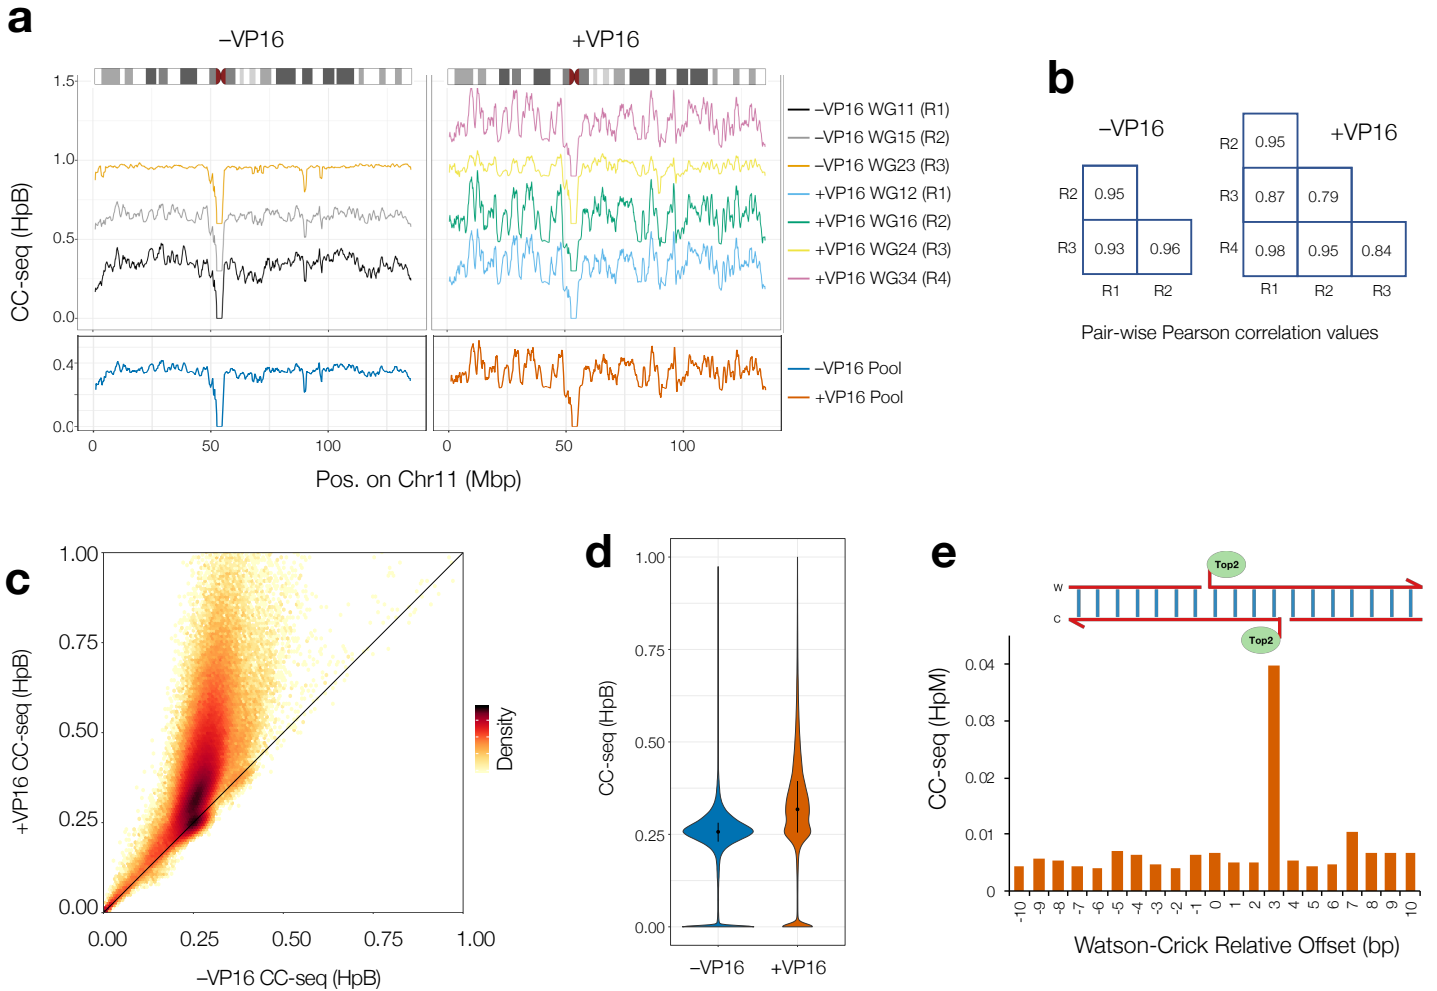

### Supplementary Figure 6. CC-seq maps of TOP2-linked DNA breaks in Human cells are enriched by VP16, and show high reproducibility and nucleotide accuracy

**a**, Broad-scale TOP2 CC-seq maps in individual biological replicates of human RPE-1 cells  $\pm$ VP16. Raw data were binned at 100 Kbp prior to plotting. Each plot is offset on the y-axis by +0.3 HpB.

**b**, Replicate-to-replicate Pearson correlation values ( $r$ ) for 10 Kbp binned TOP2 CC-seq maps of RPE-1 cells  $\pm$ VP16.

**c**, Scatter plot of -VP16 and +VP16 TOP2 CC-seq maps binned at 10 Kbp resolution. Data were first scaled according to the estimated noise fraction, and are presented in a hexagonal-binned format, where the density of overplotting is indicated by the colour scale.

**d**, Violin plots of TOP2 CC-seq maps  $\pm$ VP16 binned at 10 Kbp resolution. The inner black bar and black dot indicate the interquartile range and median.

**e**, The normalised number of TOP2 CCs retained in the CC-seq maps in RPE-1 cells +VP16 after filtering to include only sites offset by the given number of base pairs. Data were normalised over a  $\pm$ 100 bp window.

HpM, HpB = Hits per million (or billion) mapped reads per base pair.

## Supplementary Figure 7

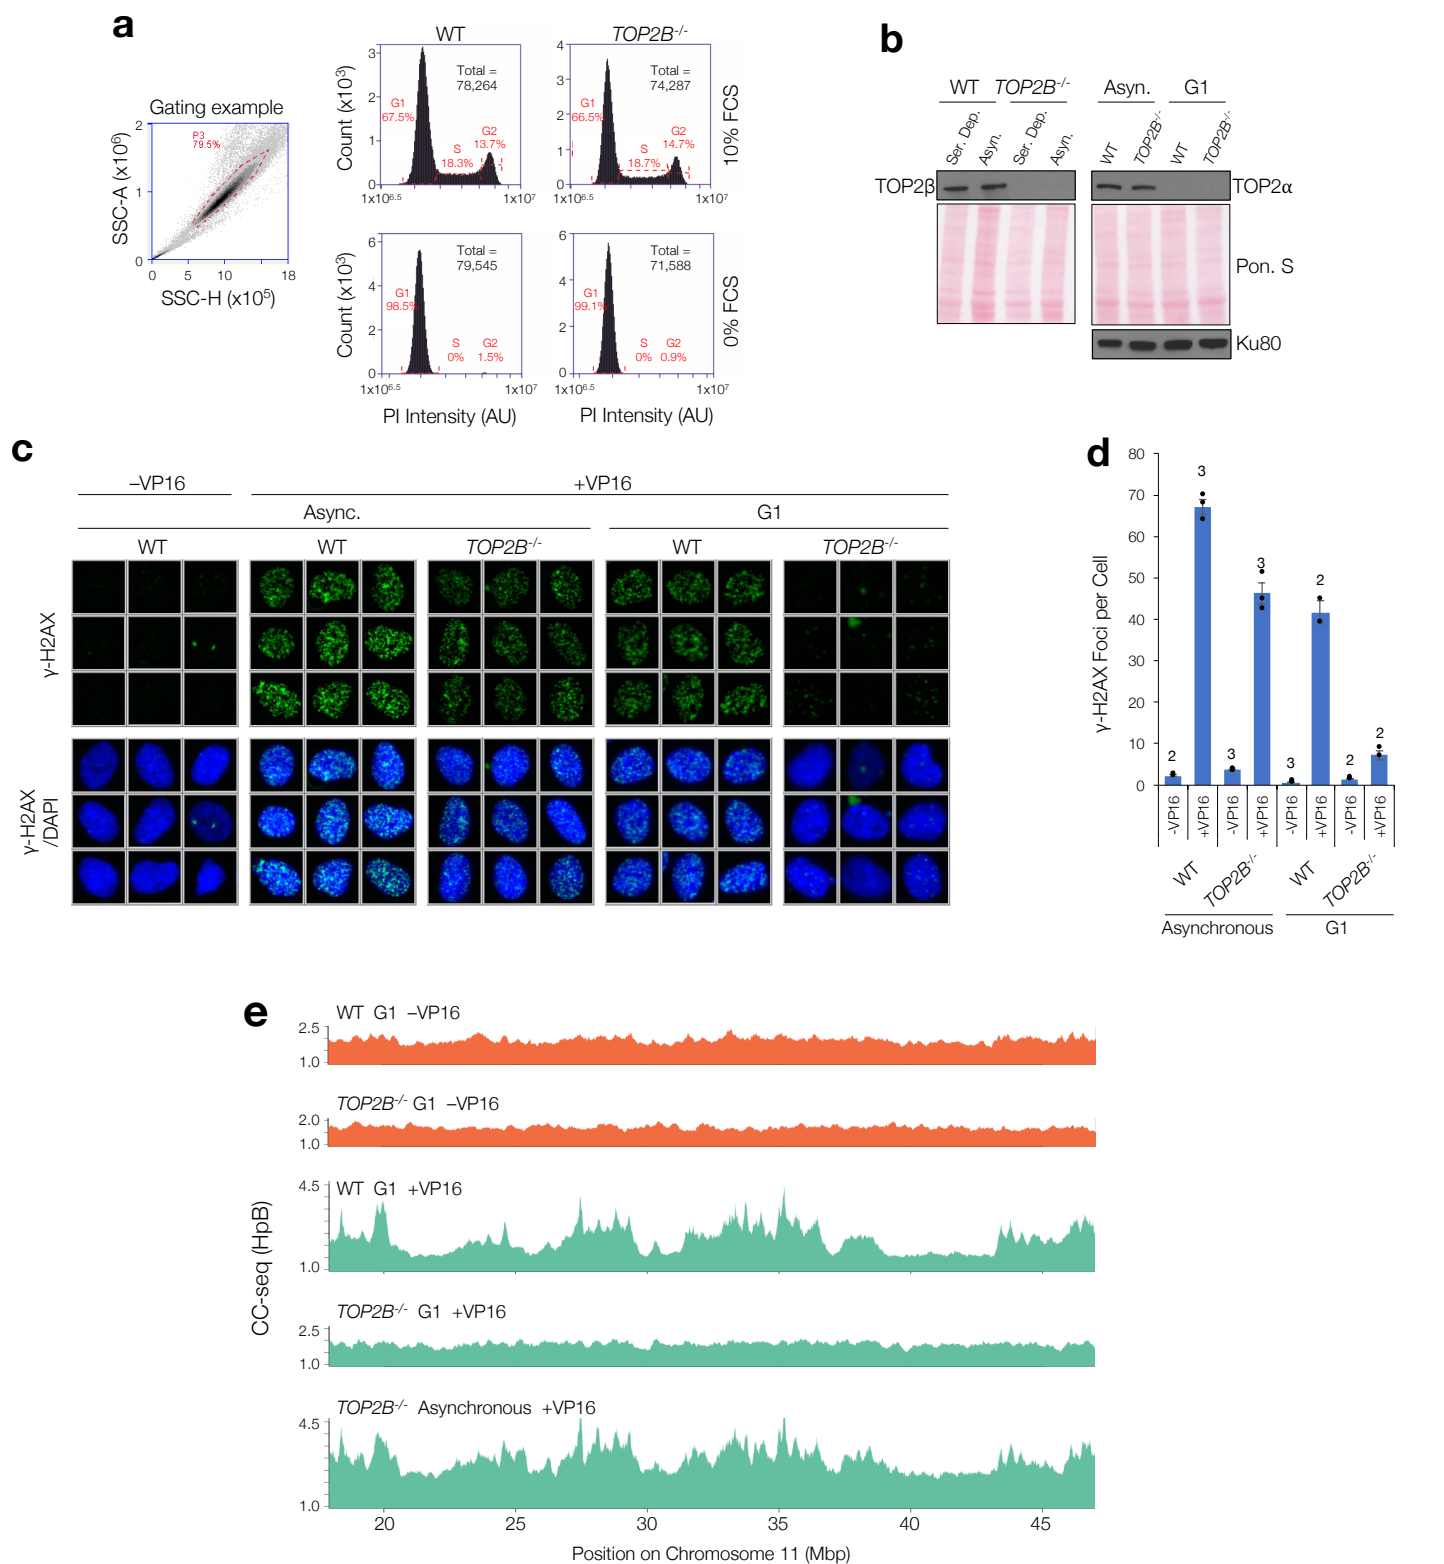

### Supplementary Figure 7. CC-seq signal is TOP2-dependent

**a**, FACS gating strategy (left) and DNA content histograms (right) of wild type (WT) and *TOP2B*<sup>-/-</sup> human RPE-1 cells under asynchronous (10% FCS) and serum-deprived (0% FCS) conditions, as measured by FACS following propidium iodide (PI) staining. G1, S and G2 populations are clearly present under asynchronous growing conditions. A strong G1 arrest is observed in serum deprived conditions. Percentages of cells in each of the indicated regions (red dotted brackets) are given.

**b**, Western blots demonstrating the absence of TOP2β protein in serum deprived and asynchronous (Asyn.) *TOP2B*<sup>-/-</sup> RPE-1 cells (left), and the absence of TOP2α in serum deprived wild type and *TOP2B*<sup>-/-</sup> RPE-1 cells (right). Ponceau S total protein loading is presented (Pon. S) for the left and right panels, and additionally a Ku80 loading control is included for the right panel.

**c**, Immunofluorescence experiment demonstrating induction of γ-H2AX foci (green) in asynchronous (Asyn.) and serum-deprived (Ser. Dep.) wild type (WT) and *TOP2B*<sup>-/-</sup> RPE-1 cells, all co-stained with DAPI (blue). Galleries of nine cells per condition were chosen randomly using Olympus ScanR Analysis software.

**d**, Quantification of (c). Numbers of γ-H2AX foci per cell were counted automatically using Olympus ScanR Analysis software. The mean ±SEM is reported for the indicated number of biological replicate experiments. Dots show the mean foci number per cell for individual replicate experiments.

**e**, Broad-scale *H. sapiens* TOP2 CC-seq maps in asynchronous and serum-deprived wild type (WT) and *TOP2B*<sup>-/-</sup> RPE-1 cells -VP16 (orange) and +VP16 (green). Raw hits on Watson and Crick strands were summed and smoothed according to local signal density. Source data are provided as a Source Data file.



## Supplementary Figure 8

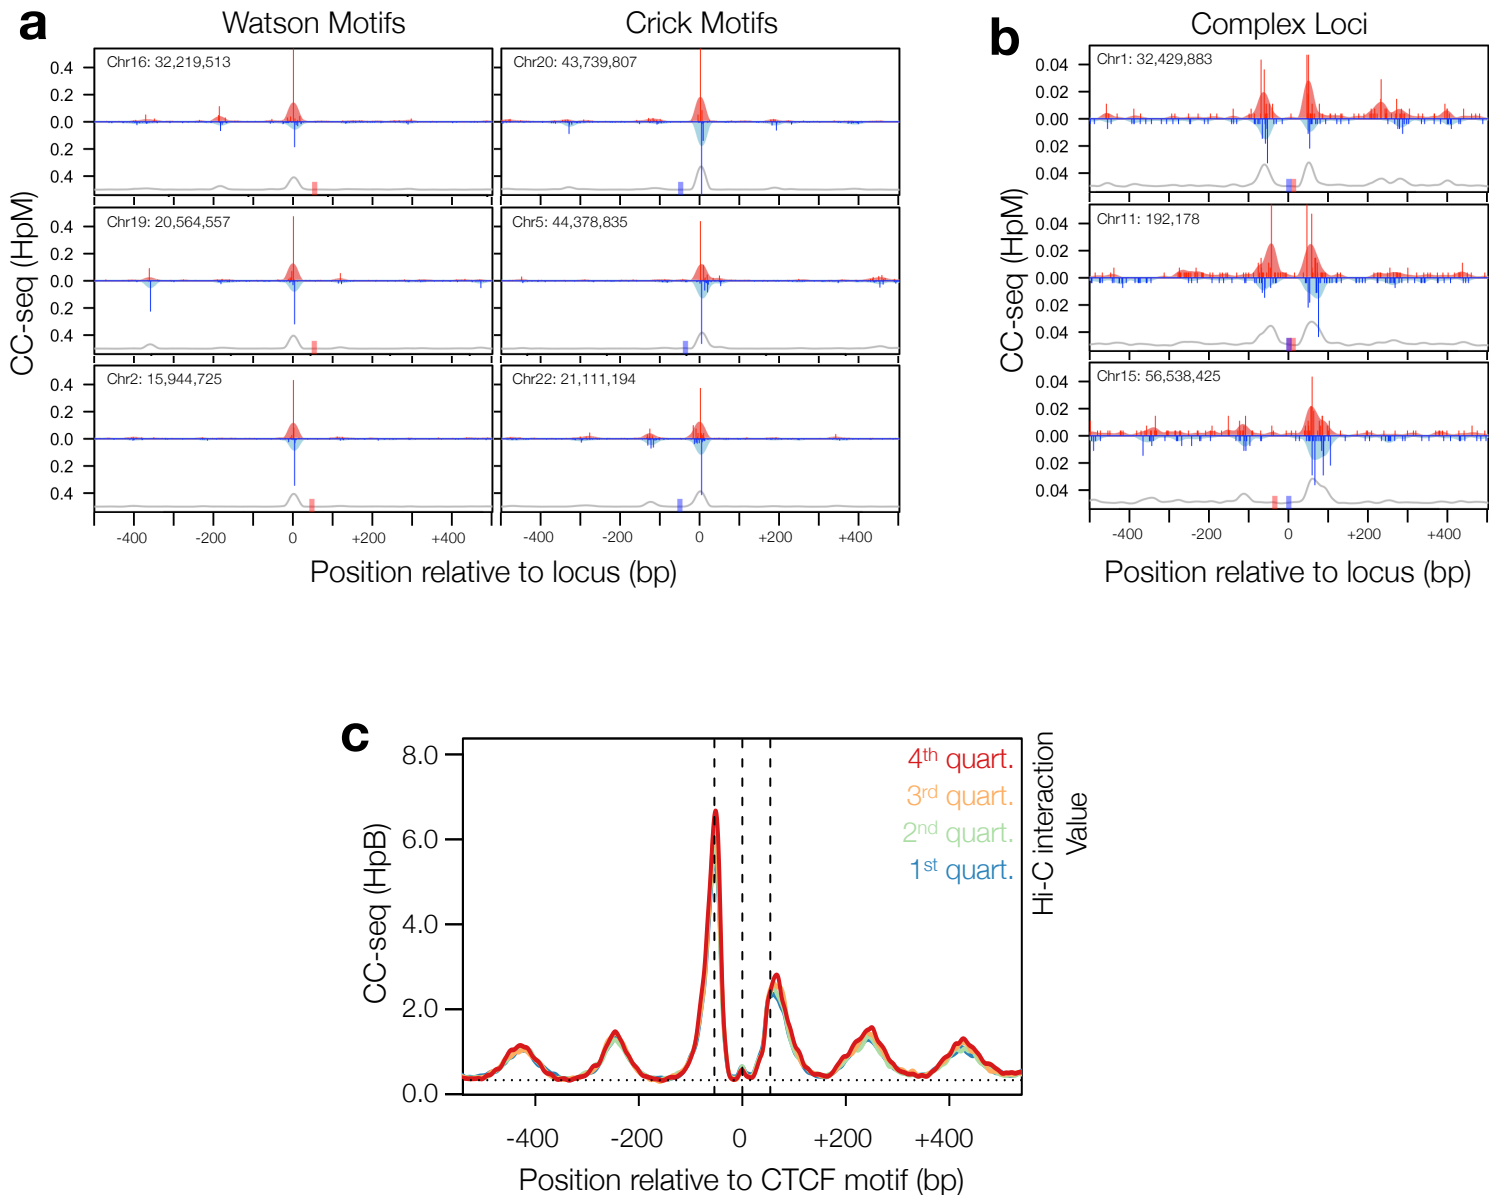

### Supplementary Figure 8. TOP2 CC-seq signal enrichment around CTCF sites

**a**, Fine-scale TOP2 CC-seq maps of CTCF-proximal loci in human RPE-1 cells +VP16. Red and blue traces indicate TOP2-linked 5' DNA termini on the Watson and Crick strands, respectively. Pale shaded areas are the same data smoothed with a sliding 11 bp Hanning window. Red and Blue rectangles indicate the positions of CTCF motifs on the Watson and Crick strands respectively. The grey line indicates Hanning-smoothed sum of Watson and Crick TOP2 CC-seq signal.

**b**, Fine-scale mapping of TOP2 CCs surrounding three complex CTCF loci, processed as in (a).

**c**, Aggregation of TOP2 CCs in a 1 Kbp window centred on the subset of orientated CTCF motifs that can be assigned to a chromatin loop anchor in human RPE-1 cells<sup>47</sup>. Motifs are stratified into four quartiles of loop anchor interaction strength, and the average TOP2 CC distribution in each quartile plotted.

## Supplementary Figure 9

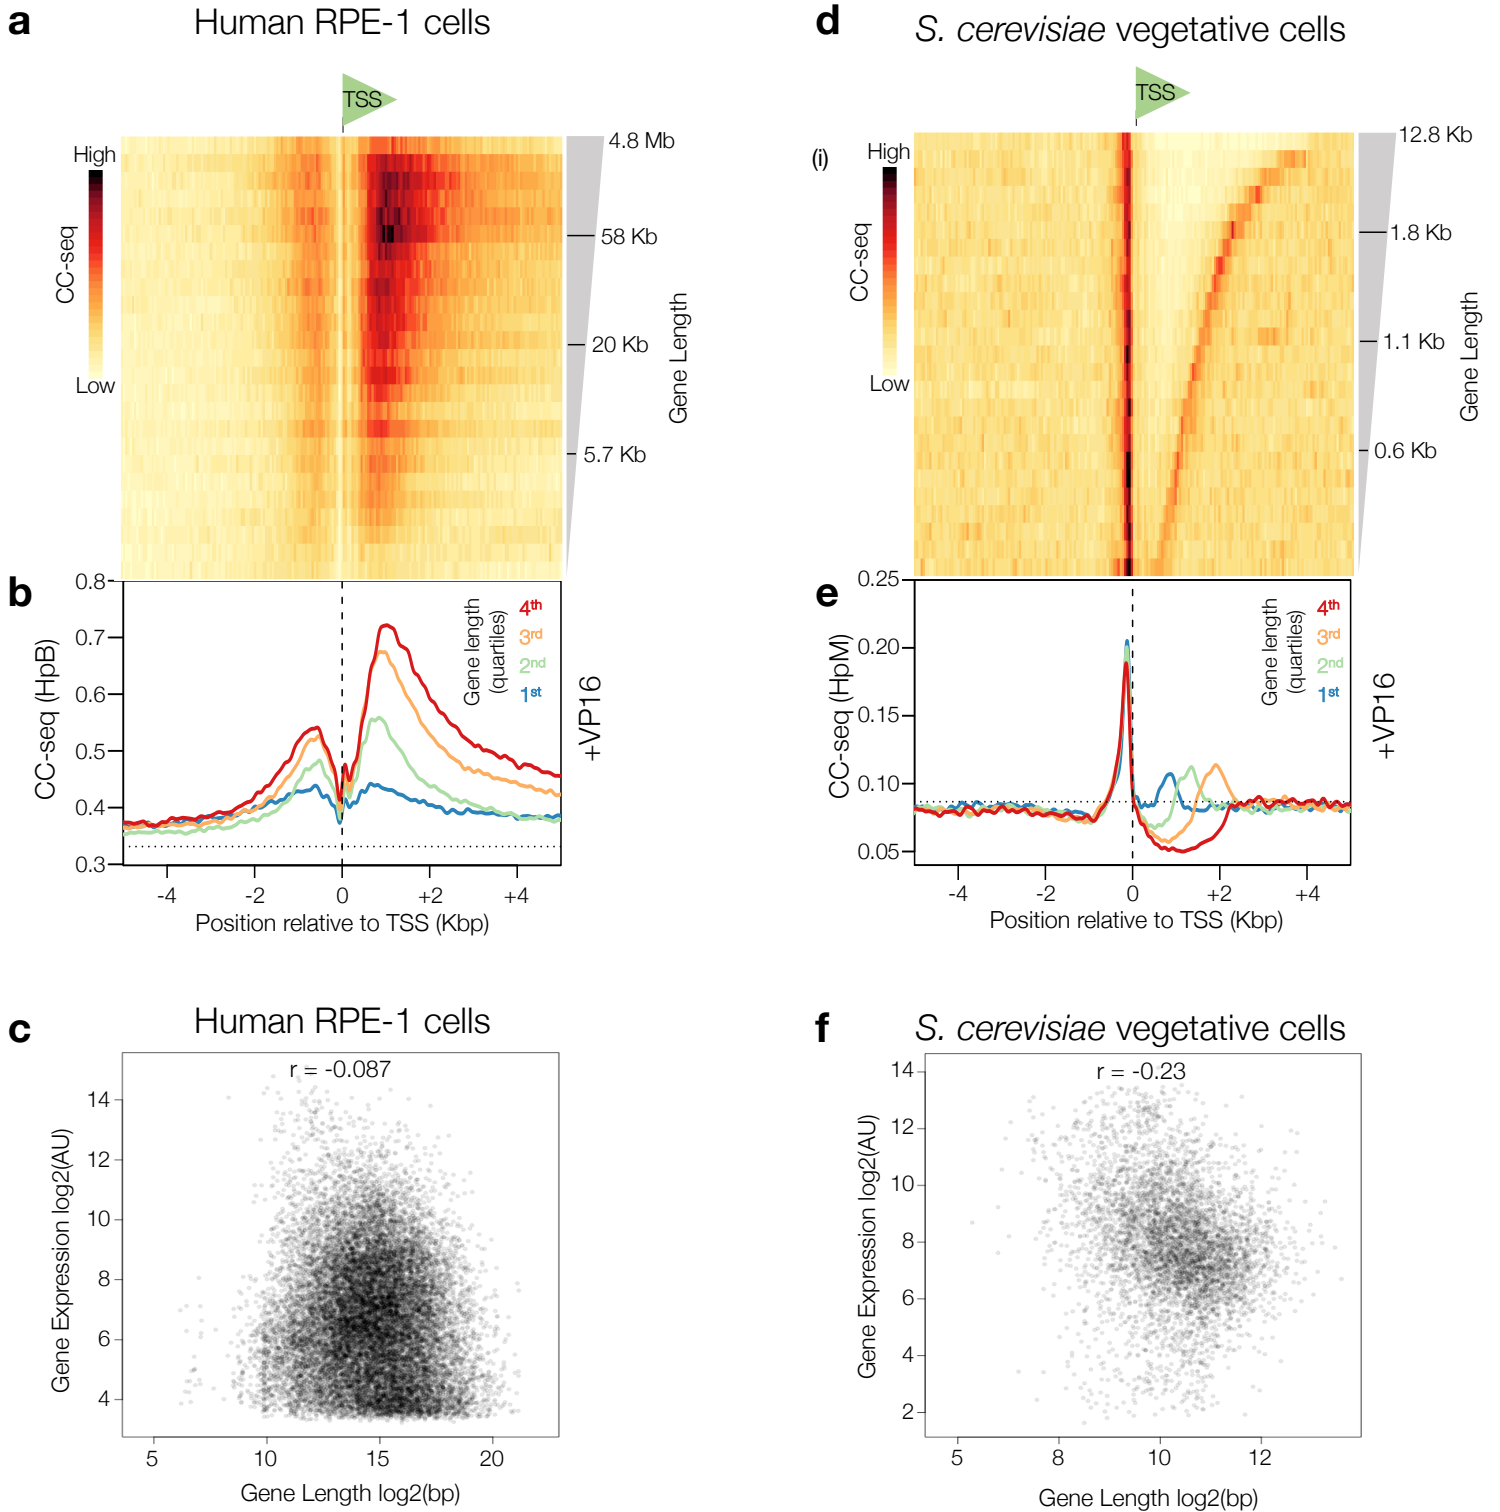

### Supplementary Figure 9. TSS-proximal TOP2-linked DNA breaks in human cells, but not in *S. cerevisiae*, are correlated with gene length

**a-b**, Aggregation of TOP2 CCs in a 10 Kbp window centred on orientated TSSs in human RPE-1 cells. **a**, A heatmap of all TSSs in the human genome, with 25 aggregated rows stratified by gene length. The colour scale indicates average TOP2 CC density in 50 bp bins. **b**, Motifs are also stratified into quartiles of gene length, and the average TOP2 CC distribution in each quartile plotted.

**c**, Scatter plot of gene length versus gene expression, indicating no correlation (Pearson,  $r$ ), suggesting that the observed relationship between CC-seq and gene length is not due to a relationship between gene length and gene expression.

**d-f**, As for **(a-c)**, but *pdr1*Δ *S. cerevisiae* vegetative Top2 CC-seq samples and vegetative gene expression data<sup>40</sup>.

# Supplementary Figure 10

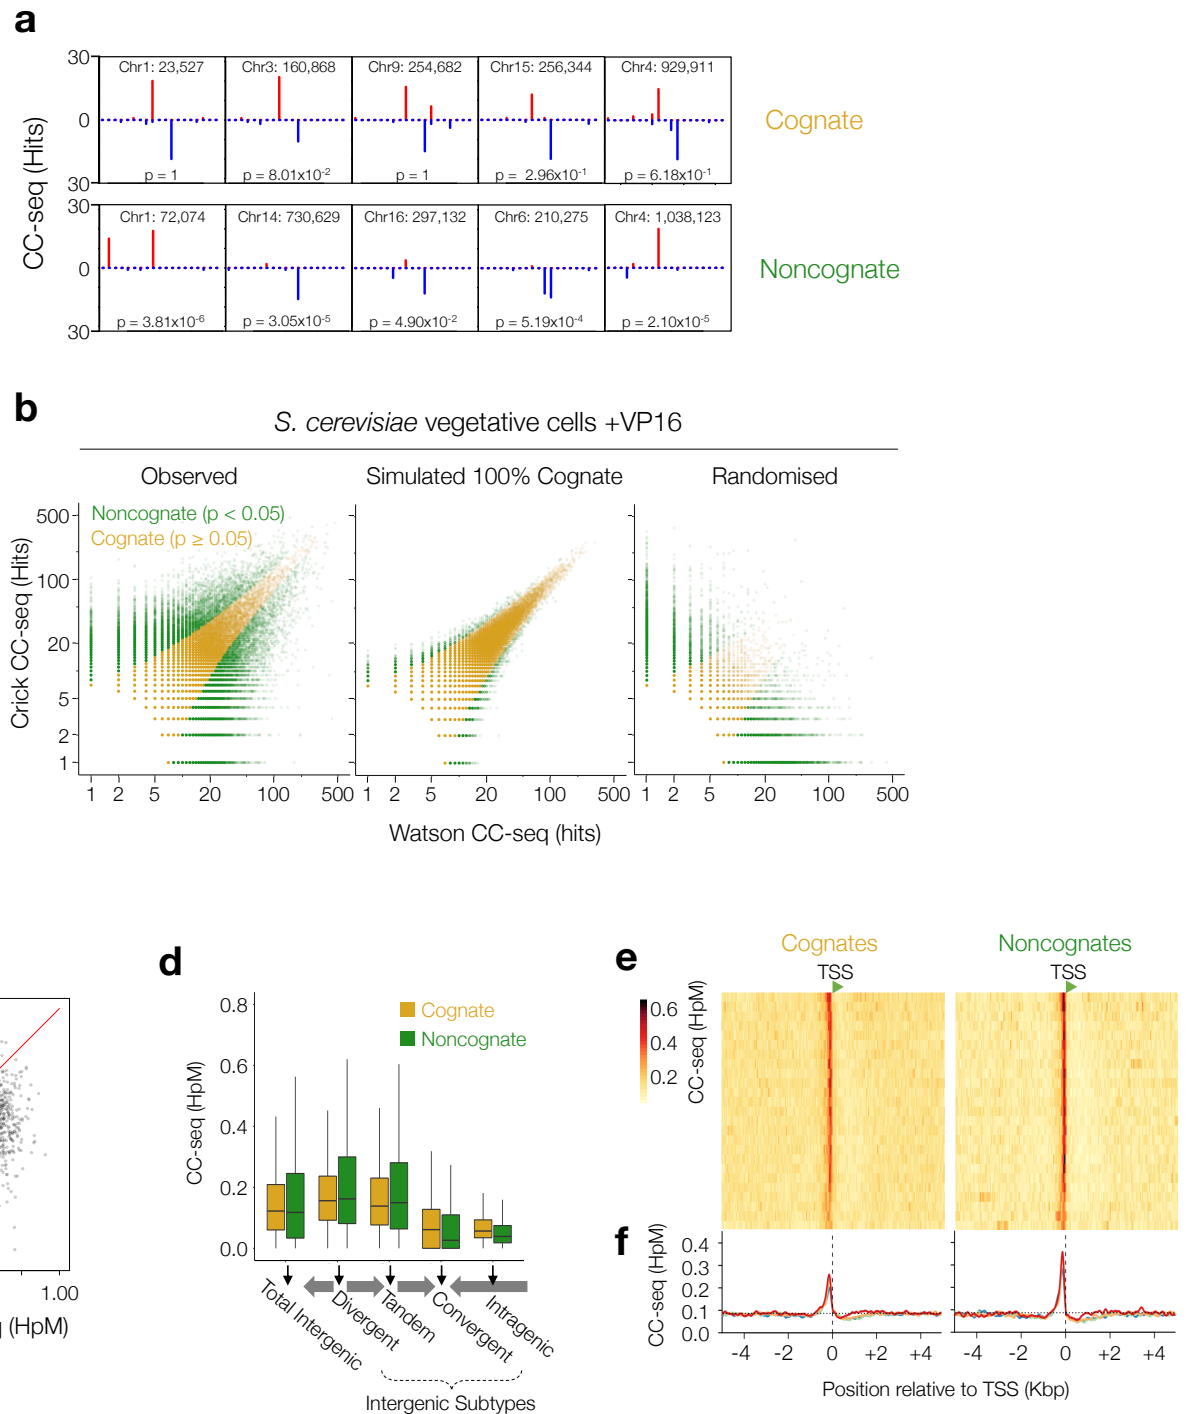

## Supplementary Figure 10. Cognate and noncognate CC-seq signal is well-correlated at broad-scale in *S. cerevisiae*.

**a**, Examples of cognate and noncognate sites (with locations) in VP16-treated *S. cerevisiae pdr1Δ mre11Δ* cells. The p-value of the two-sample, two-tailed Poisson test between hits on Watson and Crick is given.

**b**, Scatterplots of Top2 CC-seq hits on the Watson strand vs the Crick strand at each 3 bp offset site, in the observed *S. cerevisiae pdr1Δ mre11Δ* +VP16 dataset (left); a dataset sampled from a simulated dataset where all 3 bp offset sites had identical Watson and Crick values; (centre); a randomised dataset where all observed Crick hits were shuffled (right). Noncognates (green) and cognates (gold) were defined as those 3 bp offset sites with significantly different, or not significantly different Watson and Crick hits, respectively (two-sample, two-tailed Poisson test;  $p \leq 0.05$ ). Sites with fewer than 8 hits in total (Watson plus Crick) were excluded, due to insufficient statistical power.

**c**, Correlation (and Pearson  $r$  value) of 1 Kbp binned noncognate versus cognate Top2 CC-seq signal from VP16-treated *pdr1Δ mre11Δ S. cerevisiae*.

**d**, Quantification of cognate (gold) and noncognate (green) Top2 CC-seq signal in VP16-treated *pdr1Δ mre11Δ S. cerevisiae*, stratified by genomic region as in **Fig. 2d**.

**e-f**, Aggregation of cognate (left) or noncognate (right) Top2 CC-seq signal in a 10 Kbp window centred on orientated transcription start sites (TSS), in VP16-treated *pdr1Δ mre11Δ S. cerevisiae*. Heatmap of all TSSs in the *S. cerevisiae* genome, with 25 aggregated rows stratified by gene expression level<sup>47</sup> in vegetative growth. Colour scale indicates average Top2 CC-seq signal density in each 50 bp bin (**e**). Motifs are also stratified into quartiles of gene expression, and the average distribution of Top2 CC-seq signal in each quartile plotted (**f**).

HpM = Hits per million mapped reads per base pair.

## Supplementary Figure 11

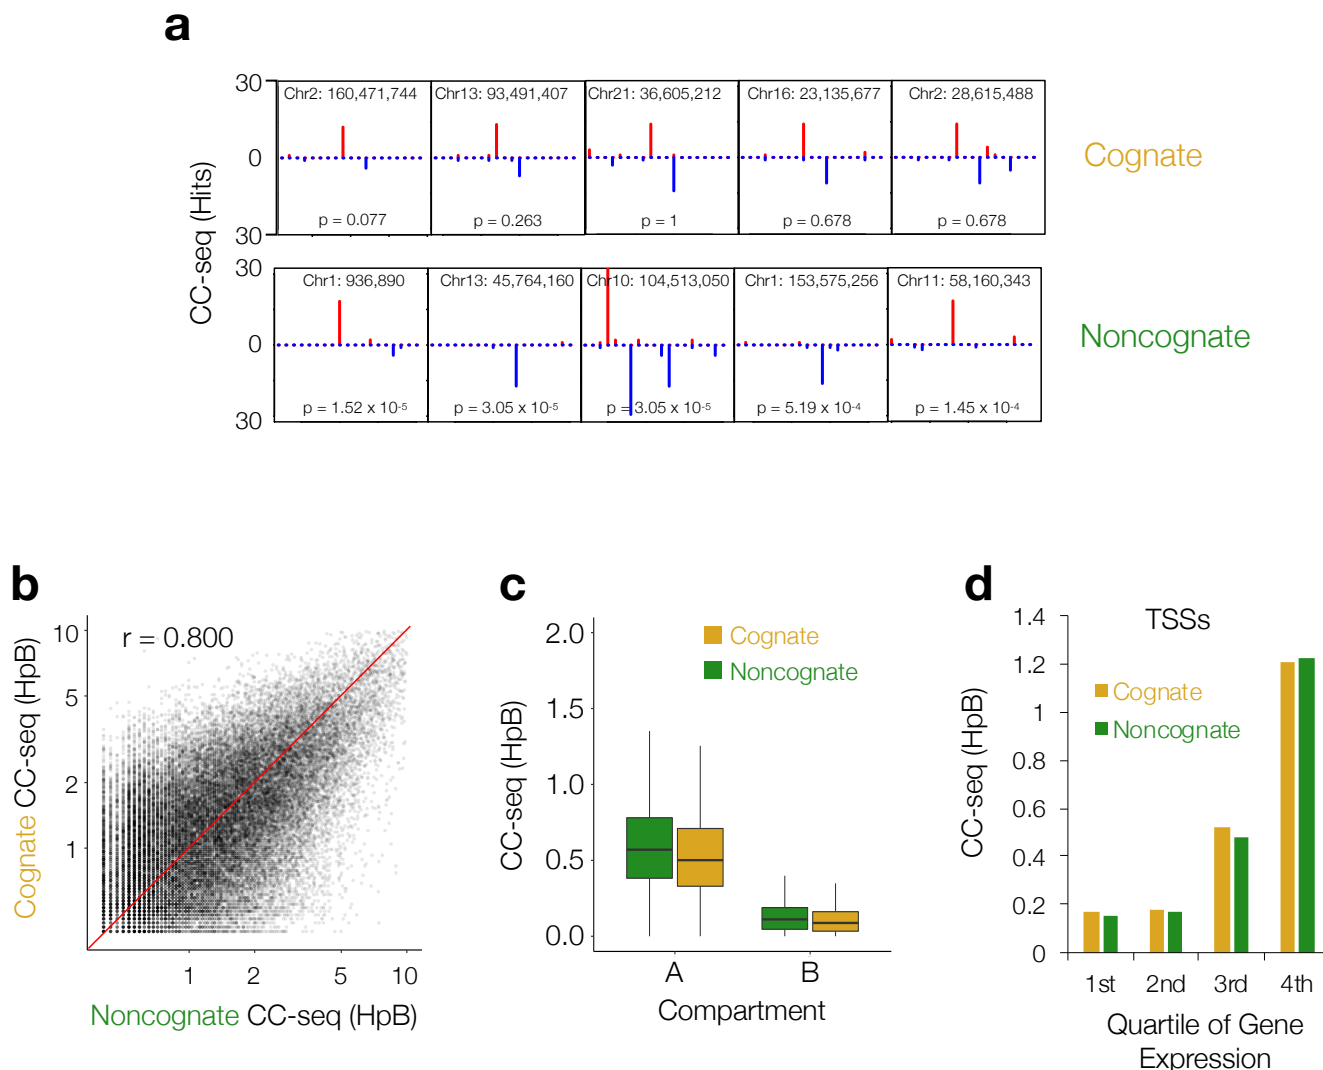

### Supplementary Figure 11. Cognate and noncognate CC-seq signal is well-correlated at broad-scale in human cells.

**a**, Examples of cognate and noncognate sites (with locations) in VP16-treated human RPE-1 cells. The p-value of the two-sample, two-tailed Poisson test between hits on Watson and Crick is given.

**b**, Correlation scatterplot (and Pearson  $r$  value) of 10 Kbp binned noncognate and cognate TOP2 CC-seq signal from VP16-treated human RPE-1 cells.

**c**, Quantification of CC-seq cognate (gold) and noncognate (green) TOP2 CCs in chromatin compartments A and B. Data are expressed as box-and-whisker plots of density as for **Fig. 2d**

**d**, Mean cognate (gold) and noncognate (green) TOP2 CC-seq signal in a 10 Kbp window centred on TSSs stratified by gene expression level. Data were corrected using a background density equal to unfractionated CC-seq signal found in the genomic region not occupied by TSSs nor CTCF-bound CTCF motifs.

HpB = Hits per billion mapped reads per base pair.

## Supplementary Figure 12

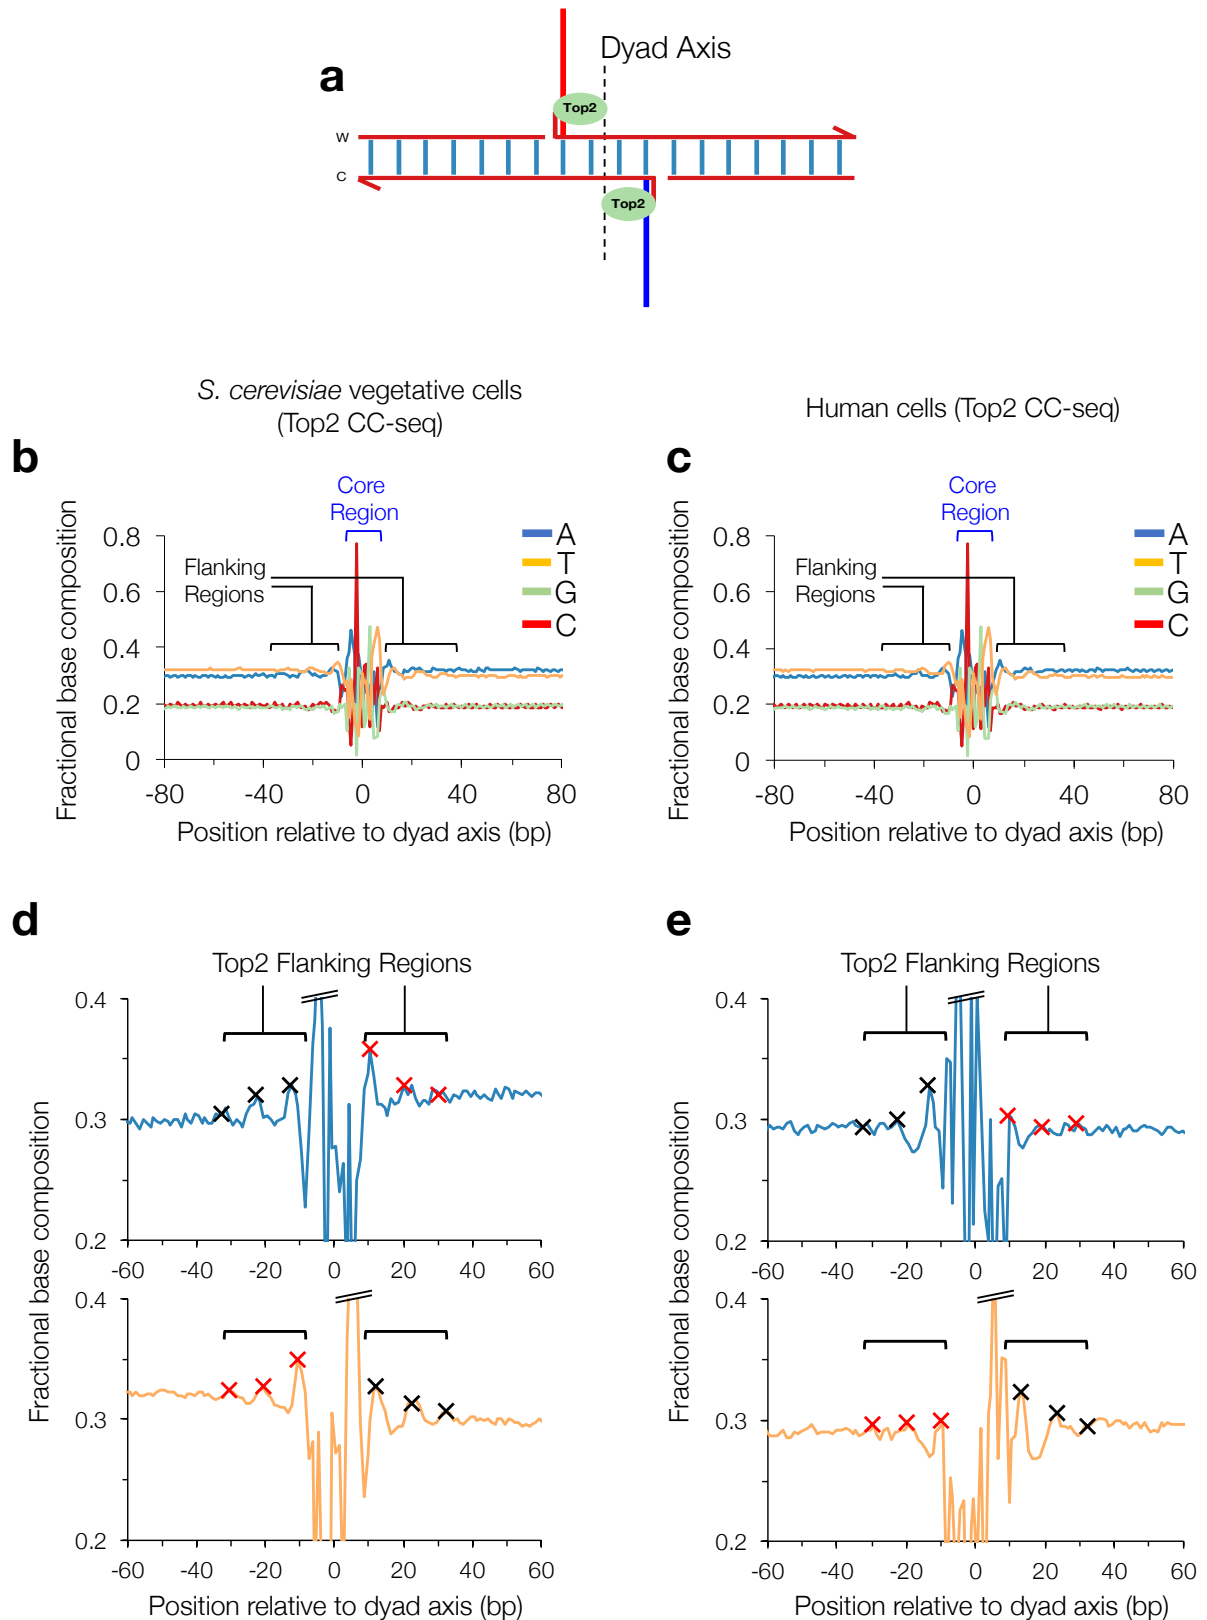

**Supplementary Figure 12. Top2-linked DNA breaks in *S. cerevisiae* and human cells have nucleotide skews in core binding region, and in flanking regions indicative of DNA distortion.**

**a**, Cartoon depicting the inferred position of the DSB dyad axis, relative to positions of Watson (red) and Crick (blue) hits.

**b**, Average nucleotide composition over a 160 bp window centred on the dyad axis in VP16-treated *pdr1Δ S. cerevisiae*. The position of the core region of bias (blue) and flanking regions of weaker bias (black) are indicated.

**c**, As in **(b)**, but for the VP16-treated human RPE-1 dataset.

**d-e**, As in **(b-c)**, but focussed in a 120 bp region centred on the dyad axis with A and T based separated for clarity. Top2 flanking regions displaying the weak ~10.5 bp periodic biases in nucleotide composition are highlighted with black and red crosses to emphasise the rotational symmetry of the skews.

## Supplementary Figure 13

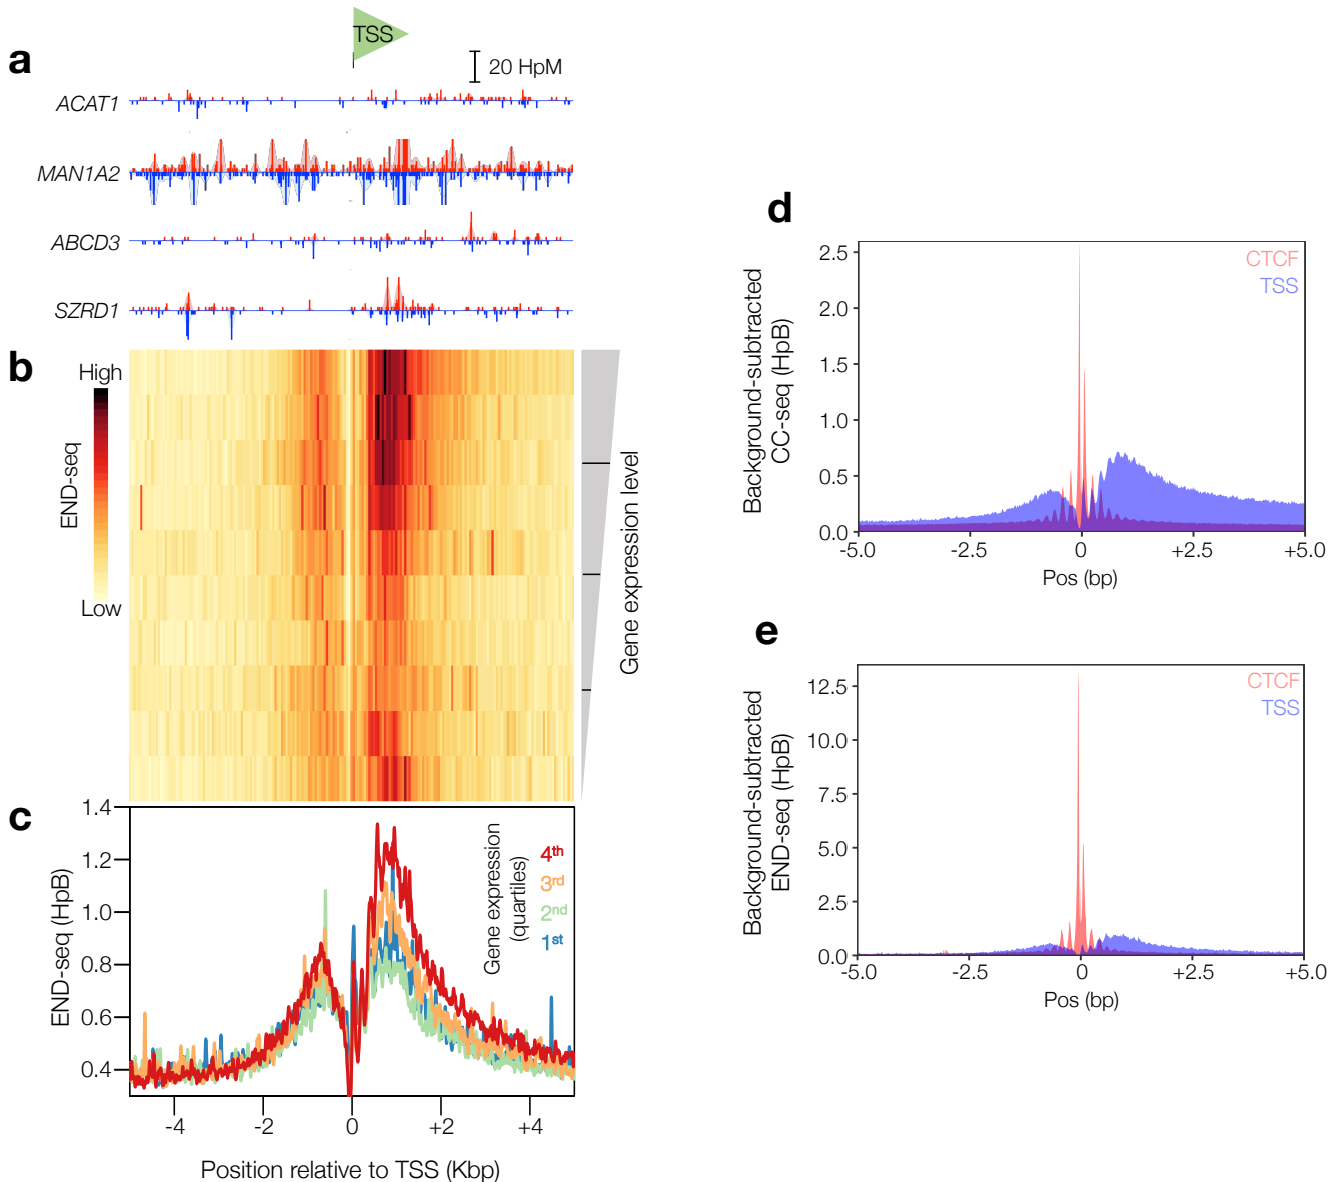

**Supplementary Figure 13. TOP2 CC-seq signal enrichment around CTCF and TSS sites, compared with END-seq DSB signal**

**a-c**, Aggregation of END-Seq DSBs in a 10 Kbp window centred on orientated TSSs in human MCF7 cells. Four example TSSs are shown orientated in the 5'-3' direction. Red and blue traces indicate DSB 5' DNA termini on the Watson and Crick strands, respectively. Pale shaded areas are the same data smoothed with a sliding 11 bp Hanning window as in **Fig. 5a**. **(a)** A heatmap of all TSSs in the human genome, with 25 aggregated rows stratified by MCF7 gene expression level<sup>78</sup>. The colour scale indicates average END-seq DSB density in each 50 bp bin **(b)**. Motifs are also stratified into quartiles of gene expression, and the average END-seq DSB distribution in each quartile plotted. Horizontal line is the genome mean. Vertical line is the TSS **(c)**.

**d-e**, Comparison of CTCF-proximal (pink) and TSS-proximal (blue) TOP2 CC-seq distributions **(d)** and END-seq DSB distributions **(e)** in the top quartile of CTCF-binding and gene-expression, respectively. Data were background-corrected by subtraction of average signal found in the genomic region containing neither TSSs, nor CTCF-bound CTCF motifs. The overlay provides a comparison of the relative strength and distribution of CTCF-proximal and TSS-proximal signals identified by the two techniques, and it does not indicate that CTCF sites and TSS sites are genomically colocalised.

HpB = Hits per billion mapped reads per base pair.

## Supplementary Tables

**Supplementary Table 1. DNA libraries used for mapping Spo11 activity.** The number of reads remaining after each stage of the data pipeline are indicated.

| Species              | Strain/ Cell line | Condition | NGS Platform | Library code | Total Read Pairs | Mapped reads | Blacklist-filtered reads | % of Total |
|----------------------|-------------------|-----------|--------------|--------------|------------------|--------------|--------------------------|------------|
| <i>S. cerevisiae</i> | sae2Δ             | Meiosis   | MiSeq        | 1            | 3512089          | 3376630      | 3177210                  | 90.5       |
|                      |                   |           |              | 2A           | 10101423         | 8796998      | 8564017                  | 84.8       |
|                      |                   |           |              | 3            | 4957477          | 4745192      | 4502308                  | 90.8       |
|                      |                   |           |              | 5            | 4012972          | 3705100      | 3559541                  | 88.7       |
|                      |                   |           |              | 7BC          | 4065600          | 3779390      | 3569290                  | 87.8       |

**Supplementary Table 2. DNA libraries used for mapping Top2 activity.** The number of reads remaining after each stage of the data pipeline are indicated.

| Species              | Strain/ Cell line          | Condition   | NGS Platform | Library code | Total Read Pairs | Mapped reads | De-duplicated reads | Blacklist-filtered reads | % of Total | Pooled Reads (Millions) |
|----------------------|----------------------------|-------------|--------------|--------------|------------------|--------------|---------------------|--------------------------|------------|-------------------------|
| <i>S. cerevisiae</i> | <i>pd1Δ</i>                | -VP16       | NextSeq 500  | RA1          | 3741251          | 3542955      | 3179049             | 2746294                  | 73.4       | 3.50                    |
|                      |                            |             |              | MiSeq        | RA8              | 1118483      | 879107              | 842290                   | 751850     |                         |
| <i>S. cerevisiae</i> | <i>pd1Δ</i>                | +VP16       | NextSeq 500  | RA2          | 3096257          | 3053356      | 2679303             | 2234941                  | 72.2       | 3.93                    |
|                      |                            |             |              | MiSeq        | RA9              | 2262958      | 2071231             | 1958341                  | 1690075    |                         |
| <i>S. cerevisiae</i> | <i>pd1Δ sae2Δ</i>          | -VP16       | NextSeq 500  | RA4          | 3634284          | 3552818      | 3215523             | 2745668                  | 75.5       | 3.79                    |
|                      |                            |             |              | MiSeq        | RA10             | 1420662      | 1214067             | 1181399                  | 1046827    |                         |
| <i>S. cerevisiae</i> | <i>pd1Δ sae2Δ</i>          | +VP16       | NextSeq 500  | RA5          | 2529368          | 2476714      | 1386551             | 1097282                  | 43.4       | 3.54                    |
|                      |                            |             |              | MiSeq        | RA11             | 3226626      | 3063388             | 2824882                  | 2444486    |                         |
| <i>S. cerevisiae</i> | <i>pd1Δ mre11Δ</i>         | -VP16       | NextSeq 500  | RA6          | 5345587          | 5205411      | 4288662             | 3646842                  | 68.2       | 4.76                    |
|                      |                            |             |              | MiSeq        | RA12             | 1519020      | 1326435             | 1280137                  | 1109310    |                         |
| <i>S. cerevisiae</i> | <i>pd1Δ mre11Δ</i>         | +VP16       | NextSeq 500  | RA7          | 3382546          | 3357168      | 2921333             | 2526342                  | 74.7       | 5.54                    |
|                      |                            |             |              | MiSeq        | RA13             | 4133347      | 4032996             | 3540366                  | 3010542    |                         |
| Human                | RPE-1 WT                   | -VP16       | NextSeq 500  | WG11         | 125203096        | 109503841    | 68845619            | 68639594                 | 54.8       | 185.36                  |
|                      |                            |             |              | WG15         | 125328792        | 110432447    | 46588296            | 46449378                 | 37.1       |                         |
|                      |                            |             |              | WG23         | 89154181         | 77728045     | 70484665            | 70269334                 | 78.8       |                         |
| Human                | RPE-1 WT                   | +VP16       | NextSeq 500  | WG12         | 110910655        | 95546007     | 55848200            | 55681939                 | 50.2       | 276.97                  |
|                      |                            |             |              | WG16         | 102804692        | 91872706     | 54312084            | 54164650                 | 52.7       |                         |
|                      |                            |             |              | WG24         | 130816235        | 114086421    | 101162102           | 100857557                | 77.1       |                         |
|                      |                            |             |              | WG34         | 91829516         | 79751337     | 66458538            | 66270349                 | 72.2       |                         |
| Human                | RPE-1 WT                   | -VP16 G1    | MiSeq        | WG13         | 2601642          | 2292863      | 2007177             | 1991088                  | 76.5       | 4.27                    |
|                      |                            |             |              | WG21         | 2610523          | 2298289      | 2295625             | 2277124                  | 87.2       |                         |
| Human                | RPE-1 WT                   | +VP16 G1    | MiSeq        | WG14         | 3075620          | 2771819      | 2491674             | 2475350                  | 80.5       | 5.23                    |
|                      |                            |             |              | WG22         | 3139164          | 2779809      | 2772349             | 2751281                  | 87.6       |                         |
| Human                | RPE-1 WT                   | -VP16 Async | MiSeq        | WG15b*       | 3207507          | 2866283      | 2782876             | 2760652                  | 86.1       | 5.35                    |
|                      |                            |             |              | WG23         | 2959289          | 2616954      | 2608670             | 2586523                  | 87.4       |                         |
| Human                | RPE-1 WT                   | +VP16 Async | MiSeq        | WG16b*       | 3018163          | 2721770      | 2673273             | 2656580                  | 88.0       | 6.30                    |
|                      |                            |             |              | WG24         | 4165048          | 3682708      | 3668602             | 3639324                  | 87.4       |                         |
| Human                | RPE-1 TOP2B <sup>-/-</sup> | -VP16 G1    | MiSeq        | WG17         | 2978044          | 2624262      | 2558332             | 2536752                  | 85.2       | 4.69                    |
|                      |                            |             |              | WG25         | 2460949          | 2181002      | 2173777             | 2155101                  | 87.6       |                         |
| Human                | RPE-1 TOP2B <sup>-/-</sup> | +VP16 G1    | MiSeq        | WG18         | 2927745          | 2588870      | 2557532             | 2537085                  | 86.7       | 5.10                    |
|                      |                            |             |              | WG26         | 2922624          | 2596547      | 2587152             | 2565454                  | 87.8       |                         |
| Human                | RPE-1 TOP2B <sup>-/-</sup> | -VP16 Async | MiSeq        | WG19         | 3713068          | 3278164      | 3188049             | 3162895                  | 85.2       | 7.04                    |
|                      |                            |             |              | WG27         | 4413242          | 3943962      | 3910035             | 3877611                  | 87.9       |                         |
| Human                | RPE-1 TOP2B <sup>-/-</sup> | +VP16 Async | MiSeq        | WG20         | 3426100          | 3038601      | 2978047             | 2956076                  | 86.3       | 8.13                    |
|                      |                            |             |              | WG28         | 5878342          | 5251089      | 5211027             | 5169010                  | 87.9       |                         |



**Supplementary Table 3. *S. cerevisiae* strains used in this study.** Strains MJ315 and M319 (both diploid SK1 background) were used for meiotic (Spo11) CC-seq mapping; strains MJ429, MJ475 and MJ551 (BY4741 haploid background) were used for vegetative (Top2) CC-seq mapping.

| Strain                   | Number | Genotype                                                                                                                                                                                              |
|--------------------------|--------|-------------------------------------------------------------------------------------------------------------------------------------------------------------------------------------------------------|
| <i>sae2Δ</i>             | MJ315  | SK1: <i>ho::LYS2'</i> , <i>lys2'</i> , <i>ura3'</i> , <i>arg4-nsp'</i> , <i>leu2::hisG'</i> , <i>his4X::LEU2'</i> , <i>nuc1::LEU2'</i> , <i>sae2Δ::KanMX6'</i>                                        |
| <i>sae2Δ spo11-Y135F</i> | MJ319  | SK1: <i>ho::LYS2'</i> , <i>lys2'</i> , <i>ura3'</i> , <i>arg4-nsp'</i> , <i>leu2::hisG'</i> , <i>his4X::LEU2'</i> , <i>nuc1::LEU2'</i> , <i>spo11(Y135F)-HA3His6::KanMX4'</i> , <i>sae2Δ::KanMX6'</i> |
| <i>pdr1Δ</i>             | MJ429  | BY4741: <i>ura3Δ0</i> , <i>leu2Δ0</i> , <i>his3Δ1</i> , <i>met15Δ0</i> , <i>pdr1Δ::PDR1-DBD-CYC8::LEU2</i>                                                                                            |
| <i>pdr1Δ sae2Δ</i>       | MJ475  | BY4741: <i>ura3Δ0</i> , <i>leu2Δ0</i> , <i>his3Δ1</i> , <i>met15Δ0</i> , <i>pdr1Δ::PDR1-DBD-CYC8::LEU2</i> , <i>sae2Δ::KanMX6</i>                                                                     |
| <i>pdr1Δ mre11Δ</i>      | MJ551  | BY4741: <i>ura3Δ0</i> , <i>leu2Δ0</i> , <i>his3Δ1</i> , <i>met15Δ0</i> , <i>pdr1Δ::PDR1-DBD-CYC8::LEU2</i> , <i>mre11Δ::KanMX4</i>                                                                    |

**Supplementary Table 4. Human cell lines used in this study.**

| Parent cell line | Clone number | Genotype                   |
|------------------|--------------|----------------------------|
| hTERT RPE-1      | WT           | WT                         |
| hTERT RPE-1      | T2B/1        | <i>TOP2B<sup>-/-</sup></i> |

**Supplementary Table 5. The annealed structures of the custom P5 and P7 adapters.** “T<sub>i</sub>” indicates an inverted dT, linked via a 3'-3' phosphodiester. This inhibits unwanted ligation at this end of the adapter. Also note that the 5'-terminal moieties of each adapter (A for P5, G for P7) are nucleosides (3'-OH), which further inhibits ligation at this end

| Adapter | Annealed Structure                                                                                                                         |
|---------|--------------------------------------------------------------------------------------------------------------------------------------------|
| P5      | <b>blocked</b> ACACCTCTTTCCCTACACGACGCTCTTCCGATCT <b>ligated</b><br><b>end</b> T <sub>i</sub> TGTGAGAAAGGGATGTGCTGCGAGAAGGCTAGp <b>end</b> |
| P7      | <b>ligated</b> pGATCGGAAGAGCACACGTCTGAACTCCAGTCACT <sub>i</sub> <b>blocked</b><br><b>end</b> TCTAGCCTTCTCGTGTGCAGACTTGAGGTCAGTG <b>end</b> |

**Supplementary Table 6. Publicly available datasets used in this study.**

| Species/ Cell line                      | Dataset Type               | Accession(s)                                                                    | Reference |
|-----------------------------------------|----------------------------|---------------------------------------------------------------------------------|-----------|
| <i>S. cerevisiae</i> / SK1 (meiotic)    | Gene expression microarray | GSM907178, GSM90719, GSM907180                                                  | 40        |
| <i>S. cerevisiae</i> / SK1 (vegetative) | Gene expression microarray | GSM907176, GSM907177                                                            | 40        |
| <i>S. cerevisiae</i> / SK1 (vegetative) | oligo-seq                  | GSE26449                                                                        | 28        |
| <i>S. cerevisiae</i> SK1 (vegetative)   | MNase-seq                  | GSM1849301, GSM1849302                                                          | 37        |
| <i>S. cerevisiae</i> SK1 (meiotic)      | MNase-seq                  | GSM1424408                                                                      | 37        |
| <i>S. cerevisiae</i> SK1 (meiotic)      | CAGE                       | <a href="http://www.yeastss.org/download/">http://www.yeastss.org/download/</a> | 39        |
| <i>H. sapiens</i> / RPE-1               | Gene expression microarray | GSM1395252, GSM1395253, GSM1395254                                              | 48        |
| <i>H. Sapiens</i> / MCF7                | Gene expression microarray | GSM1141244                                                                      | 78        |
| <i>H. sapiens</i> / RPE-1               | Hi-C                       | GSE71831                                                                        | 47        |
| <i>H. sapiens</i> / RPE-1               | bTMP-seq                   | GSM1062645, GSM1062646                                                          | 44        |
| <i>H. sapiens</i> / MCF7                | END-seq                    | GSM2635568                                                                      | 18        |
| <i>H. sapiens</i> / RPE-1               | CTCF ChIP-seq              | GSM749673, GSM1022665                                                           | 71        |
| <i>H. sapiens</i> / RPE-1               | H3K4Me3 ChIP-seq           | GSM945271, GSM945271                                                            | 71        |
| <i>H. sapiens</i> / RPE-1               | H3K27Ac ChIP-seq           | GSM733771, GSM733718, GSM733755, GSM733691, GSM733656, GSM733674, GSM733646     | 71        |
| <i>H. sapiens</i> / RPE-1               | Methyl-RRBS                | GSM683773, GSM683905                                                            | 71        |
| <i>H. sapiens</i> / K562                | MNase-seq                  | GSM920557                                                                       | 71        |
| <i>H. sapiens</i> / ARPE                | GRO-seq                    | GSM2428724                                                                      | 50        |
| <i>H. sapiens</i> / RPE                 | CAGE                       | DRA000991                                                                       | 49        |
